# Supplementary material for: Can Chemotherapy Negatively Affect the Specific Antibody Response toward Core Vaccines in Canine Cancer Patients?
Source: MDPI journal article supplement (doi:10.3390/vetsci10040303), 2023-04-20
Supplement: s1 [file s1]

**Table S1** VacchiCheck: correspondence between S scale units and antibody titers, sensitivity, and specificity for Canine Parvovirus type 2 (CPV-2), Canine Distemper Virus (CDV), and Canine Adenovirus type 1 (CAdV-1)

|                        | CPV-2 (%)   | CDV (%)     | CAdV-1 (%)  |
|------------------------|-------------|-------------|-------------|
| S0                     | <1:20       | <1:8        | <1:4        |
| S1                     | 1:20        | 1:8         | 1:4         |
| S2                     | 1:40        | 1:16        | 1:8         |
| <b>S3 (threshold)</b>  | <b>1:80</b> | <b>1:32</b> | <b>1:16</b> |
| S4                     | 1:160       | 1:64        | 1:32        |
| S5                     | 1:320       | 1:128       | 1:64        |
| S6                     | 1:640       | 1:256       | 1:128       |
| >S6                    | >1:640      | >1:256      | >1:128      |
| <i>Sensitivity (%)</i> | <i>88</i>   | <i>100</i>  | <i>94</i>   |
| <i>Specificity (%)</i> | <i>100</i>  | <i>92</i>   | <i>93</i>   |
